# Supplementary material for: p53 modeling as a route to mesothelioma patients stratification and novel therapeutic identification
Source: J Transl Med. 2018 Oct 13;16:282. doi: 10.1186/s12967-018-1650-0 (PMC6186085; doi:10.1186/s12967-018-1650-0)
Supplement: Supplementary file 9 — Additional file 9: Table S9. Univariate_Cox_regression analysis. [file 12967_2018_1650_MOESM9_ESM.xlsx]

## Sheet: S9_Table_kun20180906
	beta	HR (95% CI for HR)	wald.test	p.value
age	0.0382	1.04 (1.01-1.07)	9.12	0.00254
AATF	-0.124	0.884 (0.433-1.8)	0.12	0.734
ABCB1	0.00231	1 (0.931-1.08)	0	0.951
ABCC1	0.18	1.2 (0.967-1.48)	2.72	0.099
AIFM2	0.111	1.12 (0.846-1.48)	0.61	0.433
APAF1	0.443	1.56 (1.15-2.1)	8.36	0.00383
AR	-0.0831	0.92 (0.752-1.13)	0.65	0.421
ARID3A	0.0957	1.1 (0.822-1.47)	0.41	0.521
ATF3	0.00981	1.01 (0.865-1.18)	0.02	0.901
ATM	0.181	1.2 (0.822-1.75)	0.89	0.346
ATR	0.312	1.37 (0.978-1.91)	3.35	0.0673
AURKA	0.438	1.55 (1.25-1.93)	15.4	8.47e-05
AXIN1	0.567	1.76 (1.2-2.6)	8.2	0.00419
Apoptosis	0.00979	1.01 (0.993-1.03)	1.25	0.263
BAK1	0.166	1.18 (0.803-1.73)	0.71	0.399
BAX	0.105	1.11 (1.03-1.19)	8.24	0.0041
BBC3	-0.0508	0.95 (0.765-1.18)	0.21	0.646
BCL2	-0.0479	0.953 (0.848-1.07)	0.65	0.421
BCL3	0.285	1.33 (1.01-1.74)	4.25	0.0392
BCL6	0.484	1.62 (1.08-2.43)	5.54	0.0186
BDKRB1	0.0903	1.09 (0.93-1.29)	1.17	0.278
BNIP3L	0.000391	1 (0.683-1.47)	0	0.998
BRCA1	0.203	1.22 (1.11-1.35)	16	6.32e-05
BTG2	-0.0331	0.967 (0.749-1.25)	0.06	0.8
CALD1	0.196	1.22 (0.894-1.65)	1.55	0.213
CASP8	-0.0126	0.987 (0.711-1.37)	0.01	0.94
CCNA2	NA	NA (NA-NA)	NA	NA
CCNB1	0.212	1.24 (0.983-1.55)	3.29	0.0696
CCND1	0.0656	1.07 (1.02-1.12)	7.01	0.00812
CCNG1	-0.153	0.858 (0.678-1.09)	1.63	0.202
CD44	0.0815	1.08 (0.97-1.21)	2.04	0.153
CD58	-0.0114	0.989 (0.74-1.32)	0.01	0.939
CD59	-0.0802	0.923 (0.696-1.22)	0.31	0.578
CD82	0.121	1.13 (0.948-1.34)	1.84	0.175
CDC20	0.361	1.43 (1.21-1.71)	16.6	4.61e-05
CDC25A	0.0964	1.1 (0.769-1.58)	0.28	0.599
CDK2	NA	NA (NA-NA)	NA	NA
CDK4	0.458	1.58 (1.2-2.08)	10.8	0.00104
CDK5	0.202	1.22 (0.92-1.63)	1.93	0.165
CDK9	0.113	1.12 (0.685-1.83)	0.2	0.654
CDKN1A	-0.0396	0.961 (0.843-1.1)	0.35	0.554
CDKN1B	-0.0798	0.923 (0.828-1.03)	2.06	0.151
CDKN2A	-0.102	0.903 (0.77-1.06)	1.57	0.21
CHEK1	0.55	1.73 (1.3-2.31)	14.2	0.000165
CHEK2	0.151	1.16 (0.927-1.46)	1.71	0.191
CIAPIN1	0.492	1.64 (1.06-2.52)	4.97	0.0257
CKB	-0.0621	0.94 (0.819-1.08)	0.78	0.376
CKM	0.0586	1.06 (0.944-1.19)	0.98	0.321
CKS2	0.408	1.5 (1.19-1.91)	11.3	0.000783
COL18A1	0.0786	1.08 (0.895-1.31)	0.66	0.417
CSNK2A2	0.608	1.84 (1.18-2.86)	7.25	0.00709
CXCR4	0.0992	1.1 (1.01-1.21)	4.62	0.0316
Cellularsenescence	-0.0336	0.967 (0.947-0.987)	10.4	0.00123
DDB2	-0.142	0.868 (0.688-1.09)	1.44	0.23
DDIT4	0.348	1.42 (1.16-1.73)	11.5	0.000689
DDX5	-0.00239	0.998 (0.667-1.49)	0	0.991
DFNA5	NA	NA (NA-NA)	NA	NA
DKK1	0.105	1.11 (1.02-1.21)	5.58	0.0182
DNAdamage	NA	NA (NA-NA)	NA	NA
DUSP2	0.0553	1.06 (0.886-1.26)	0.38	0.539
DUSP4	0.108	1.11 (0.888-1.4)	0.88	0.349
DUSP5	0.131	1.14 (0.953-1.36)	2.06	0.151
DYRK2	0.212	1.24 (0.964-1.58)	2.8	0.0944
E2F1	0.143	1.15 (1.06-1.25)	11.9	0.000551
ECT2	0.49	1.63 (1.3-2.04)	18.3	1.87e-05
EDA2R	-0.109	0.897 (0.772-1.04)	2	0.157
EGFR	0.137	1.15 (1.04-1.26)	7.68	0.00559
EIF2AK2	0.265	1.3 (0.953-1.78)	2.75	0.0971
ELAVL1	0.746	2.11 (1.27-3.51)	8.27	0.00403
EPHB4	0.355	1.43 (1.14-1.78)	9.81	0.00173
ERBB2	0.237	1.27 (1.04-1.54)	5.53	0.0187
ESR1	-0.0683	0.934 (0.816-1.07)	0.99	0.321
EZH2	0.184	1.2 (1.09-1.33)	13.3	0.000268
FAS	0.0189	1.02 (0.814-1.28)	0.03	0.869
FDXR	-0.201	0.818 (0.644-1.04)	2.73	0.0987
FEN1	0.345	1.41 (1.05-1.91)	5.1	0.024
FGF2	0.117	1.12 (0.976-1.29)	2.63	0.105
FHL2	0.137	1.15 (0.889-1.48)	1.11	0.291
FOS	-0.0315	0.969 (0.94-0.999)	4.12	0.0423
FOXM1	0.462	1.59 (1.28-1.96)	18.3	1.89e-05
GADD45A	0.132	1.14 (0.871-1.5)	0.92	0.339
GAPDH	0.119	1.13 (0.86-1.47)	0.75	0.388
GSTP1	0.0476	1.05 (0.796-1.38)	0.11	0.736
GTSE1	0.313	1.37 (1.09-1.71)	7.56	0.00598
H2AFZ	0.484	1.62 (1.12-2.35)	6.51	0.0107
HDAC1	0.36	1.43 (1.07-1.91)	6.01	0.0142
HIC1	0.085	1.09 (0.916-1.29)	0.93	0.335
HIF1A	0.146	1.16 (1.01-1.33)	4.2	0.0404
HIPK2	0.174	1.19 (0.908-1.56)	1.59	0.208
HIPK4	0.103	1.11 (0.837-1.47)	0.52	0.472
HMMR	0.355	1.43 (1.18-1.73)	13.1	0.00029
HNF4A	0.218	1.24 (0.949-1.63)	2.49	0.115
HOXA11	0.0793	1.08 (0.954-1.23)	1.52	0.217
HSP90AB1	0.494	1.64 (1.25-2.16)	12.5	0.000412
HSPA4	0.0943	1.1 (1.01-1.2)	4.75	0.0292
HTATIP2	0.09	1.09 (0.842-1.42)	0.45	0.5
ICAM1	0.0836	1.09 (0.891-1.33)	0.68	0.411
ID3	0.155	1.17 (0.969-1.41)	2.67	0.103
IER3	0.0795	1.08 (0.825-1.42)	0.33	0.567
IFI16	0.0333	1.03 (0.778-1.37)	0.05	0.818
IFITM2	0.145	1.16 (0.878-1.52)	1.07	0.301
IFNA1	NA	NA (NA-NA)	NA	NA
IGF1R	0.38	1.46 (1.19-1.8)	12.8	0.000343
IGFBP1	0.0366	1.04 (0.952-1.13)	0.71	0.4
IGFBP7	0.0401	1.04 (0.843-1.29)	0.14	0.71
IL6	0.139	1.15 (0.979-1.35)	2.89	0.0892
IQCB1	0.307	1.36 (1.01-1.82)	4.24	0.0395
ISG15	0.0226	1.02 (0.895-1.17)	0.11	0.739
KAT2B	-0.118	0.889 (0.679-1.16)	0.73	0.394
KLF4	-0.0917	0.912 (0.763-1.09)	1.01	0.314
KRT19	0.0706	1.07 (0.951-1.21)	1.3	0.253
KRT8	0.0801	1.08 (0.972-1.21)	2.1	0.148
LATS2	0.0686	1.07 (0.781-1.47)	0.18	0.67
LTF	0.0104	1.01 (0.938-1.09)	0.08	0.783
MAP4	0.482	1.62 (1.23-2.14)	11.5	0.000681
MAP4K4	0.178	1.2 (0.841-1.7)	0.99	0.32
MAPK1	NA	NA (NA-NA)	NA	NA
MAPK14	0.139	1.15 (0.803-1.64)	0.58	0.447
MAPK8	0.417	1.52 (1.05-2.2)	4.82	0.0281
MAPK9	0.629	1.88 (1.25-2.82)	9.06	0.00261
MCL1	0.0839	1.09 (0.947-1.25)	1.41	0.236
MCTS1	0.542	1.72 (1.09-2.71)	5.47	0.0194
MDM2	-0.0595	0.942 (0.707-1.26)	0.16	0.685
MDM4	-0.33	0.719 (0.568-0.909)	7.63	0.00575
MGMT	0.316	1.37 (1.02-1.84)	4.47	0.0344
MMP1	0.00679	1.01 (0.957-1.06)	0.07	0.793
MMP13	NA	NA (NA-NA)	NA	NA
MMP2	0.14	1.15 (1.06-1.24)	12.5	0.000414
MSH2	0.328	1.39 (1-1.92)	3.91	0.0481
MUC1	0.181	1.2 (0.995-1.44)	3.64	0.0566
MYC	0.109	1.12 (0.973-1.28)	2.45	0.118
MYCN	0.0605	1.06 (0.963-1.17)	1.46	0.226
NCL	0.504	1.66 (1.13-2.43)	6.67	0.00978
NLRC4	0.109	1.12 (0.844-1.47)	0.59	0.443
NME1	0.382	1.46 (1.09-1.97)	6.39	0.0114
NOTCH1	-0.00638	0.994 (0.795-1.24)	0	0.955
NOV	-0.127	0.881 (0.744-1.04)	2.17	0.141
NR2C1	0.373	1.45 (1.08-1.95)	6.27	0.0123
NTN1	0.00921	1.01 (0.876-1.16)	0.02	0.899
PADI4	0.155	1.17 (0.99-1.38)	3.38	0.0659
PARK2	-0.337	0.714 (0.182-2.81)	0.23	0.63
PCBP4	0.228	1.26 (0.962-1.64)	2.81	0.0936
PCNA	NA	NA (NA-NA)	NA	NA
PDGFRB	0.148	1.16 (0.984-1.36)	3.13	0.0767
PDRG1	0.408	1.5 (1.12-2.02)	7.38	0.00658
PEG3	-0.113	0.893 (0.772-1.03)	2.32	0.127
PERP	0.0476	1.05 (0.926-1.19)	0.56	0.453
PIDD1	-0.0616	0.94 (0.672-1.32)	0.13	0.719
PLAUR	0.185	1.2 (0.98-1.48)	3.11	0.0779
POU4F1	0.069	1.07 (0.778-1.48)	0.18	0.673
PPM1A	0.0495	1.05 (0.681-1.62)	0.05	0.823
PPM1D	0.194	1.21 (0.824-1.79)	0.96	0.326
PRC1	0.435	1.54 (1.27-1.88)	19	1.31e-05
PRKCA	0.442	1.56 (1.26-1.92)	16.7	4.31e-05
PRKD1	-0.0235	0.977 (0.792-1.2)	0.05	0.826
PRKDC	0.595	1.81 (1.3-2.52)	12.5	0.000411
PRKG1	0.017	1.02 (0.865-1.2)	0.04	0.837
PRSS50	0.118	1.12 (0.934-1.35)	1.54	0.214
PSEN1	0.369	1.45 (1.06-1.97)	5.41	0.02
PSMD10	0.607	1.83 (1.13-2.97)	6.06	0.0138
PTEN	-0.0964	0.908 (0.692-1.19)	0.48	0.487
PTGS2	0.02	1.02 (0.992-1.05)	1.98	0.159
PTTG1	0.397	1.49 (1.18-1.88)	11.2	0.000819
RAD51	NA	NA (NA-NA)	NA	NA
RAF1	0.364	1.44 (1.06-1.96)	5.3	0.0213
RAS	0.32	1.38 (1.11-1.71)	8.33	0.0039
RECQL4	0.442	1.56 (1.25-1.94)	15.4	8.71e-05
RGCC	-0.0226	0.978 (0.797-1.2)	0.05	0.828
RGS16	-0.07	0.932 (0.787-1.1)	0.66	0.417
RPRM	-0.0451	0.956 (0.88-1.04)	1.13	0.287
RREB1	0.279	1.32 (0.9-1.94)	2.03	0.155
RRM2B	-0.0939	0.91 (0.698-1.19)	0.48	0.489
S100A2	0.31	1.36 (1.14-1.64)	11	0.000889
S100A6	0.224	1.25 (1-1.56)	3.96	0.0467
SEMA3B	-0.0501	0.951 (0.846-1.07)	0.7	0.404
SERPINB5	0.0906	1.09 (1.02-1.17)	6.38	0.0116
SERPINF1	-0.0457	0.955 (0.785-1.16)	0.21	0.649
SESN2	0.159	1.17 (0.879-1.57)	1.17	0.28
SFN	0.0768	1.08 (0.983-1.19)	2.54	0.111
SGK1	0.0893	1.09 (0.887-1.35)	0.7	0.404
SIAH1	0.143	1.15 (0.974-1.37)	2.73	0.0986
SIVA1	0.332	1.39 (1.03-1.89)	4.56	0.0328
SLC2A1	0.21	1.23 (1.09-1.39)	11.5	0.000706
SLC2A4	0.0202	1.02 (0.824-1.26)	0.03	0.853
SLC6A6	0.0759	1.08 (0.864-1.35)	0.45	0.502
SOX4	0.205	1.23 (0.961-1.57)	2.69	0.101
SP7	-0.0561	0.945 (0.812-1.1)	0.52	0.47
TCF7L2	0.154	1.17 (0.81-1.68)	0.69	0.408
TFDP1	0.408	1.5 (1.17-1.94)	9.93	0.00163
TGFA	-0.0144	0.986 (0.775-1.25)	0.01	0.906
TGFB1	0.078	1.08 (1-1.17)	4.06	0.0439
THBS1	-0.0756	0.927 (0.732-1.17)	0.39	0.531
TIAF1	0.0803	1.08 (0.801-1.47)	0.27	0.603
TIGAR	-0.139	0.87 (0.654-1.16)	0.91	0.34
TLR3	-0.113	0.893 (0.719-1.11)	1.04	0.307
TNFRSF10A	-0.0315	0.969 (0.762-1.23)	0.07	0.798
TNFRSF10B	0.137	1.15 (0.961-1.37)	2.32	0.128
TP53AIP1	0.0366	1.04 (0.987-1.09)	2.09	0.148
TP53I13	0.0371	1.04 (0.768-1.4)	0.06	0.809
TP53INP1	-0.102	0.903 (0.674-1.21)	0.47	0.494
VEGFA	0.0266	1.03 (0.977-1.08)	1.09	0.297
VRK1	0.514	1.67 (1.18-2.36)	8.48	0.00358
WWP1	0.362	1.44 (1.05-1.96)	5.27	0.0217
XAF1	0.12	1.13 (0.92-1.38)	1.34	0.247
YBX1	0.577	1.78 (1.19-2.68)	7.71	0.00548
ZMAT3	-0.118	0.888 (0.698-1.13)	0.92	0.338
