# Supplementary material for: p53 modeling as a route to mesothelioma patients stratification and novel therapeutic identification
Source: J Transl Med. 2018 Oct 13;16:282. doi: 10.1186/s12967-018-1650-0 (PMC6186085; doi:10.1186/s12967-018-1650-0)
Supplement: Supplementary file 17 — Additional file 17: Figure S2. TP53 protein is stabilized by DNA damage in Mero-14 cells. (A) Mero-14 cells were untreated or treated with etoposide (20 µM) for 24 h, after which cells were lysed and protein harvested and subjected to Western blotting using antibodies against TP53 and actin. (B) ImageJ quantification of TP53 expression in Mero-14 cells following etoposide treatment. (C) Sequence alignment of the coding sequence of the TP53 gene (exons 1–11) from Mero-14 cell line. [file 12967_2018_1650_MOESM17_ESM.pdf]

Figure S2

A

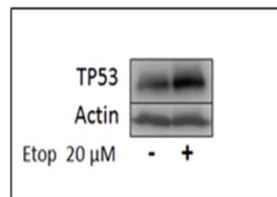

B

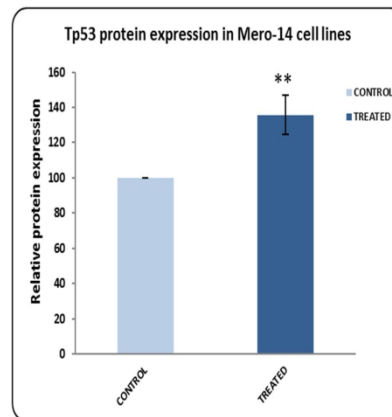

**P53 protein levels and stabilisation induced by DNA damage in Mero-14 cells** **A.** Detection of the Total p53 protein levels in the Mero-14 cell lines with and without DNA damage by using SDS PAGE and Western Blotting. The cell lines were incubated for 24 hrs with or without 20 $\mu$ M etoposide. **B.** Quantification of the wild-type p53 protein levels in the Mero-14 shown in Figure S2A, which was generated by using ImageJ software. Data is representative of three experiments; band intensity was normalised to  $\beta$ -actin. \*indicates  $p < 0.05$ .

(C) Sequence alignment of the coding sequence of the TP53 gene (exons 1–11) from Mero-14 cell line, as described in Methods.

|                                                                 |                                                                                                                                                                                                             |
|-----------------------------------------------------------------|-------------------------------------------------------------------------------------------------------------------------------------------------------------------------------------------------------------|
| TP53,RefSeqNG_017013.2<br>P53,NC_000017Exon1<br>Mero14,P53Exon1 | <pre>       4810      4820      4830      4840      4850      4860 ..... ..... ..... ..... ..... .....  ACCAATTCTGCCCTCACAGCTCTGGCTTGCGAGATTTTCCACCCCAAAATGTTAGTATCT ----- </pre>                           |
| TP53,RefSeqNG_017013.2<br>P53,NC_000017Exon1<br>Mero14,P53Exon1 | <pre>       4910      4920      4930      4940      4950      4960 ..... ..... ..... ..... ..... .....  TCCCAACTCCATTTCCTTTGCTTCCCTCCGGCAGGCGGATTACTTGCCCTTACTTGTTCAT ----- </pre>                          |
| TP53,RefSeqNG_017013.2<br>P53,NC_000017Exon1<br>Mero14,P53Exon1 | <pre>       5010      5020      5030      5040      5050      5060 ..... ..... ..... ..... ..... .....  GATGGGATTGGGGTTTTCCCTCCCATGTGCTCAAGACTGGCGCTAAAAGTTTGAGCTT ----- </pre>                             |
| TP53,RefSeqNG_017013.2<br>P53,NC_000017Exon1<br>Mero14,P53Exon1 | <pre>       5110      5120      5130      5140      5150      5160 ..... ..... ..... ..... ..... .....  CTGGGCTCCGGGGACACTTTGCGTTCGGGCTGGGAGCGTGCTTCCACGACGGTGACACG ----- </pre>                            |
| TP53,RefSeqNG_017013.2<br>P53,NC_000017Exon1<br>Mero14,P53Exon1 | <pre>       5210      5220      5230      5240      5250      5260 ..... ..... ..... ..... ..... .....  TCCTCTCTGAGTCACGGGCTCTCGGCTCCGTGTATTTTCAGCTCGGGAAATCGCTGGGG ----- </pre>                            |
| TP53,RefSeqNG_017013.2<br>P53,NC_000017Exon2<br>Mero14,P53Exon2 | <pre>      15910     15920     15930     15940     15950     15960     15970 ..... ..... ..... ..... ..... ..... .....  TGCTGGATCCCCACTTTTCTCTTGCAGCAGCCAGACTGCCCTCCGGGTCACTGCCATGGAGGAGCCGCA ----- </pre>  |
| TP53,RefSeqNG_017013.2<br>P53,NC_000017Exon2<br>Mero14,P53Exon2 | <pre>      16010     16020     16030     16040     16050     16060     16070 ..... ..... ..... ..... ..... ..... .....  TCAGGAACATTTTCAGACCTATGGAACCTGTGAGTGGATCCATTGGAAGGGCAGGCCACCACCCCCAC ----- </pre>   |
| TP53,RefSeqNG_017013.2<br>P53,NC_000017Exon2<br>Mero14,P53Exon2 | <pre>      16110     16120     16130     16140     16150     16160     16170 ..... ..... ..... ..... ..... ..... .....  GGGAAGCGAAAAATTCATGGGACTGACTTTCTGCTCTTGTCTTTCAGACTTCCTGAAAACAACGTTCTGG ----- </pre> |
| TP53,RefSeqNG_017013.2<br>P53,NC_000017Exon3<br>Mero14,P53Exon3 | <pre>      16110     16120     16130     16140     16150     16160     16170 ..... ..... ..... ..... ..... ..... .....  GGGAAGCGAAAAATTCATGGGACTGACTTTCTGCTCTTGTCTTTCAGACTTCCTGAAAACAACGTTCTGG ----- </pre> |

16310 16320 16330 16340 16350  
 TGGATGATTGATGCTGCCCGGACGATATTGAACAATGGTTCACCTGAAGAC  
 .....  
 .....

16410 16420 16430 16440 16450  
GGCCCC**TGCACCAGCAGCTCCTACACCGCGGCCCTGCACCAGCCCCCTCCT**  
.....  
.....

16510 16520 16530 16540 16550  
TACGGTTTCCGCTCTGGGCTTCTTGCAATCTGGGACAGCCAAGTCTGTGACTTG

16610 16620 16630 16640 16650  
TGGCCGTATCCCCCTGCATTTCTTTTGTGGAACTTTGGGATTCCTCTTCAC

17310 17320 17330 17340 17350  
TCCCTCTTCCTACAGTACTCCCCCTGCCCTCAACAAGATGTTTTGCCAACTGGCC

17410 17420 17430 17440 17450  
C A C C C G C G T C C G C G C C A T G G C C A T C T A C A A G C A G T C A C A G C A C A T G A C G G A G C

17510 17520 17530 17540 17550  
GAGCAGCTGGGGCTGGAGAGACGACAGGGCTGTTGCCAGGGTCCCCAGGCC

17610 17620 17630 17640 17650  
TTATCCGAGTGGAAAGAAATTTGCGTGTGGAGTATTTGGATGACAGAAACACT  
.....

17710 17720 17730 17740 17750  
TGCAACTGGGGTCTCTGGGAGGAGGGTTAAGGGTGGTTGTCAGTGGCCCTCC

TP53,RefSeqNG\_017013.2  
P53,NC\_000017Exon7  
Mero14,P53Exon7

```
18210 18220 18230 18240 18250 18260 182
....|....|....|....|....|....|....|
GCTTGCCACAGGTCTCCCCAAGGCGCACTGGCCTCATCTTGGGCCGTGTGTTATCTCCTAGGTTGGCTCTG
.....|.....|.....|.....|.....|.....|.....|
```

TP53,RefSeqNG\_017013.2  
P53,NC\_000017Exon7  
Mero14,P53Exon7

```
18310 18320 18330 18340 18350 18360 183
....|....|....|....|....|....|....|
GTAACAGTTCTGCATGGGCGGCATGAACCGGAGGCCCATCCTCACCATCATCACACTGGAAGACTCCAG
.....|.....|.....|.....|.....|.....|.....|
```

TP53,RefSeqNG\_017013.2  
P53,NC\_000017Exon7  
Mero14,P53Exon7

```
18410 18420 18430 18440 18450 18460 184
....|....|....|....|....|....|....|
GCCTGCTGTGCCCCAGCCTCTGCTTGCTCTGACCCCTGGGCCACCTCTTACCGATTTCCTCATACTA
.....|.....|.....|.....|.....|.....|.....|
```

TP53,RefSeqNG\_017013.2  
P53,NC\_000017Exon8,9  
Mero14,P53Exon8,9

```
18710 18720 18730 18740 18750 187
....|....|....|....|....|....|....|
CTATCCTGAGTAGTGGTAATCTACTGGGACGGAACAGCTTTGAGGTGCGTGTGTTGTGCCT
.....|.....|.....|.....|.....|.....|.....|
```

TP53,RefSeqNG\_017013.2  
P53,NC\_000017Exon8,9  
Mero14,P53Exon8,9

```
18810 18820 18830 18840 18850 188
....|....|....|....|....|....|....|
CAAGAAAGGGGAGCCTCACCACGAGCTGCCCCAGGGAGCACTAAGCGAGGTAAGCAAGC
.....|.....|.....|.....|.....|.....|.....|
```

TP53,RefSeqNG\_017013.2  
P53,NC\_000017Exon8,9  
Mero14,P53Exon8,9

```
18910 18920 18930 18940 18950 189
....|....|....|....|....|....|....|
CCTCAGATTCACTTTTATCACCTTTCCCTTGCCCTCTTCCTAGCACTGCCCAACAAACCA
.....|.....|.....|.....|.....|.....|.....|
```

TP53,RefSeqNG\_017013.2  
P53,NC\_000017Exon8,9  
Mero14,P53Exon8,9

```
19010 19020 19030 19040 19050 190
....|....|....|....|....|....|....|
ATATTTACCCCTTCAGGTACTAAGTCTTGGGACCTCTTATCAAGTGGAAAGTTTCCAGTC
.....|.....|.....|.....|.....|.....|.....|
```

TP53,RefSeqNG\_017013.2  
P53,NC\_000017Exon10  
Mero14,P53Exon10

```
21810 21820 21830 21840 21850 21860 218
....|....|....|....|....|....|....|
ATATACTTACTTCTCCCCCTCCTCTGTTGCTGCAGATCCGTGGGCGTGAGCGCTTCGAGATGTTCCGAGA
.....|.....|.....|.....|.....|.....|.....|
```

TP53,RefSeqNG\_017013.2  
P53,NC\_000017Exon10  
Mero14,P53Exon10

```
21910 21920 21930 21940 21950 21960 219
....|....|....|....|....|....|....|
CCAGGCTGGGAAGGAGCCAGGGGGAGCAGGGCTCACTCCAGGTGAGTGACCTCAGCCCCCTCCTGGCCC
.....|.....|.....|.....|.....|.....|.....|
```

TP53,RefSeqNG\_017013.2  
P53,NC\_000017Exon10  
Mero14,P53Exon10

```
22010 22020 22030 22040 22050 22060 220
....|....|....|....|....|....|....|
ATAGGATTCCATTCTCATCTGCCTTCATGGTCAAAGGCAGCTGACCCCATCTCATTGGGTCCCAGCCCT
.....|.....|.....|.....|.....|.....|.....|
```

|                        |                                                                            |       |       |       |       |       |     |  |
|------------------------|----------------------------------------------------------------------------|-------|-------|-------|-------|-------|-----|--|
| TP53,RefSeqNG_017013.2 | 22710                                                                      | 22720 | 22730 | 22740 | 22750 | 22760 | 227 |  |
| P53,NC_000017Exon11    | ..... ..... ..... ..... ..... ..... .....                                  |       |       |       |       |       |     |  |
| Mero14,P53Exon11       | GGTGCTCAGTAAACATATTTGCATGGGGTGTGGCCACCATCTTGATTTGAATTCCCGTTGTCCCAGCCTT     |       |       |       |       |       |     |  |
| TP53,RefSeqNG_017013.2 | 22810                                                                      | 22820 | 22830 | 22840 | 22850 | 22860 | 228 |  |
| P53,NC_000017Exon11    | ..... ..... ..... ..... ..... ..... .....                                  |       |       |       |       |       |     |  |
| Mero14,P53Exon11       | GGGCACAGACCCCTCTCACTCATGTGATGTCATCTCTCCTCCCTGCTTCTGTCTCCTACAGCCACCTGAAG    |       |       |       |       |       |     |  |
| TP53,RefSeqNG_017013.2 | 22910                                                                      | 22920 | 22930 | 22940 | 22950 | 22960 | 229 |  |
| P53,NC_000017Exon11    | ..... ..... ..... ..... ..... ..... .....                                  |       |       |       |       |       |     |  |
| Mero14,P53Exon11       | AAAAAACTCATGTTCAAGACAGAAAGGCCCTGACTCAGACTGACATTTCTCCACTTCTTGTTCCTCCCACTGAC |       |       |       |       |       |     |  |
| TP53,RefSeqNG_017013.2 | 23010                                                                      | 23020 | 23030 | 23040 | 23050 | 23060 | 230 |  |
| P53,NC_000017Exon11    | ..... ..... ..... ..... ..... ..... .....                                  |       |       |       |       |       |     |  |
| Mero14,P53Exon11       | CCATTTTGGGTTTGGGTCTTTGAACCCCTTGCTTGCAATAGGTGTGCGTCAGAAGCACCCAGGACTTCCA     |       |       |       |       |       |     |  |
| TP53,RefSeqNG_017013.2 | 23110                                                                      | 23120 | 23130 | 23140 | 23150 | 23160 | 231 |  |
| P53,NC_000017Exon11    | ..... ..... ..... ..... ..... ..... .....                                  |       |       |       |       |       |     |  |
| Mero14,P53Exon11       | GTTGGCCTGCACCTGGTGTGTTTGTGTTGGGAGGAGGATGGGGAGTAGGACATACCAGCTTAGATTTTAAG    |       |       |       |       |       |     |  |
| TP53,RefSeqNG_017013.2 | 23210                                                                      | 23220 | 23230 | 23240 | 23250 | 23260 | 232 |  |
| P53,NC_000017Exon11    | ..... ..... ..... ..... ..... ..... .....                                  |       |       |       |       |       |     |  |
| Mero14,P53Exon11       | TAAGAAATGTTCTTGCAGTTAAGGGTTAGTTTACAATCAGCCACATTCTAGGTAGGGGCCCACTTCACCG     |       |       |       |       |       |     |  |
